# Supplementary material for: Iowa Implementation for Sustainability Framework
Source: Springer Nature journal article supplement (doi:10.1186/s13012-021-01157-5), 2022-01-04
Supplement: MOESM1 [file 19999582]

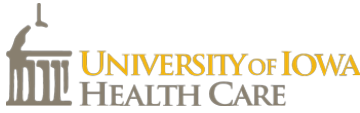

Default Question Block

Evaluation of the Evidence-Based Practice Implementation Model

Background

Thank you for agreeing to participate in this survey. Your expert opinion is highly valued. The questions should take approximately 30 minutes to complete. If you partially complete the survey you may recommence it at any time from the [same computer](#).

There are numerous process models that describe the necessary steps for evidence-based practice in nursing. 'Implementation' is a critical step in each of these models, yet there has traditionally been limited guidance on how best this is achieved. The Evidence-Based Practice Implementation Model (implementation model) was first published in 2012 as an application-oriented resource for nurses to plan evidence-based practice implementation in complex healthcare systems. The implementation model aides in the selection of implementation strategies that are suitable to the phase of implementation and specific target groups.

The implementation phases are displayed as columns progressing from awareness and interest to integration and sustained use. Each column includes strategies based on the goal for that implementation phase. Implementation strategies also target two distinct groups and are arranged in rows accordingly. The first row specifically targets the clinicians and organizational leaders, including key stakeholders. The second row builds support for the practice change at the organization or systems level. Project leaders select implementation strategies for their EBP initiative that are appropriate for their particular unit and organization.

Click below to open Implementation Strategies in a new window  
[Implementation Strategies for EBP](#)

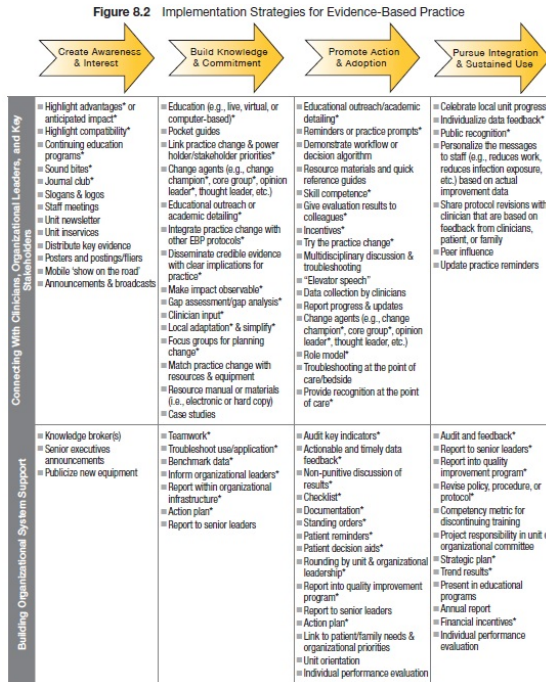

After seven years of use it is time to evaluate the Evidence-Based Practice Implementation Models usefulness, validity and impact on adoption of EBP. This survey seeks feedback on the implementation model from users to ascertain its strengths, limitations and content validity.

The following questions relate to you and your experience using the Evidence-Based Practice Implementation Model (implementation model).

What is your professional discipline?

- Dietitian
- Dentist
- Nurse
- Occupational Therapist
- Pharmacist
- Physical Therapist
- Physician
- Psychologist
- Social Worker
- Speech-Language Pathologist

Other:

What is your highest level of education?

- Associate Degree
- Bachelor Degree
- Master Degree
- Doctoral Degree
- Other:

What is your primary role in your current organization?

- Clinician
- Administrator
- Educator
- Researcher
- Clinical Nurse Specialist/Practice Leader
- Student
- Not currently employed
- Other:

What type of organization do you currently work for?

- College or University
- Hospital
- Long term skilled care
- Community
- Ambulatory clinic
- Other:

What type of hospital do you work for? [select all that apply]:

- Public (state or federal) facility
- Academic medical center
- Community hospital
- Critical access hospital
- Other:

What type of community organization do you work for? [select all that apply]:

- Home care
- Public health
- School
- Hospice
- Other:

What is the location of your organization?

- Africa
- Asia/ Pacific
- Europe
- Latin America
- Middle East
- United States
- North America (non-US)

In which state do you currently reside?

What was your purpose for using the implementation model? (select all that apply)

- Classroom teaching
- Student paper or assignment
- Magnet application/reapplication
- Organization wide EBP project
- Unit/clinic based EBP project
- Research/ research grant
- Publication/presentation
- I have not used it
- Other:

How did you use the implementation model? (select all that apply)

- As a standalone implementation model
- In conjunction with the Iowa Model of Evidence-Based Practice
- In conjunction with another model for EBP
- Other

Which model did you use in conjunction with another model for EBP?

How would you rate your experience with the implementation model?

- Novice- lacking experience and confidence
- Advanced Beginner- just beginning, developing experience and confidence
- Competent- building skill and experience but confident in use
- Proficient- skilled, experienced, confident, able to troubleshoot problems
- Expert- extensive experience, highly skilled, confident, able to hone in on solutions

The following questions seek your opinion on the usefulness, usability, generalizability, and adaptability of the implementation model.

How useful do you find the implementation model as a resource for EBP?

- Not useful
- Somewhat useful
- Useful
- Very useful

What changes would you recommend to increase the implementation models usefulness?

How easy do you find the implementation model to use?

- Not easy
- Somewhat easy
- Easy
- Very easy

What changes would you recommend to increase the implementation models ease of use?

How intuitive is the implementation model to novice users?

- Not intuitive
- Somewhat intuitive
- Intuitive
- Very intuitive

What changes would you recommend to increase ease of use for novice users?

Do you believe the model is generalizable to different disciplines, settings, and populations?

- Disagree
- Somewhat disagree
- Somewhat agree
- Agree

What changes would you recommend to make the model more generalizable?

Do you believe the model is flexible and adaptive enough to be used in conjunction with other EBP models and frameworks?

- Disagree
- Somewhat disagree
- Somewhat agree
- Agree

What changes would you recommend to make the model more flexible and adaptive?

How likely are you to use the implementation model in the future?

- Not likely
- Somewhat likely
- Likely
- Very likely

What changes would you recommend that would increase the likelihood you would use it again?

The following questions seek your opinion on the components of the implementation model (the implementation strategies, implementation phases, and socio-ecological levels).

Do you believe the implementation model phases (creating awareness and interest, building knowledge and commitment, promoting action and adoption, and pursuing integration and sustainability) accurately represent the stages of implementation?

- Disagree
- Somewhat disagree
- Somewhat agree
- Agree

What changes would you recommend to the phases of the implementation model?

Do you believe that the target groups identified in the implementation model (clinicians and organizational leaders, including key stakeholders; and organizational and systems support) accurately represent the socio-ecological levels associated with implementation?

- Disagree
- Somewhat disagree
- Somewhat agree
- Agree

What changes would you recommend to the target groups?

Would adding a target group for patients/care givers be an important socio-ecological level to add?

- Yes
- No

Do you believe the implementation model contains a comprehensive selection of implementation strategies?

- Disagree
- Somewhat disagree
- Somewhat agree
- Agree

What changes would you recommend to the implementation strategies?

**Block 1**

For each implementation strategy please select all of the phase(s) and target group(s) that you believe the strategy can be applied to.

|             | Phase (select all that apply)   |                                   |                               |                                         |                          | Target Group [select all that apply]                    |                                    |                          | Comment<br>Enter comments below                            |
|-------------|---------------------------------|-----------------------------------|-------------------------------|-----------------------------------------|--------------------------|---------------------------------------------------------|------------------------------------|--------------------------|------------------------------------------------------------|
|             | Creating awareness and interest | Building knowledge and commitment | Promoting action and adoption | Pursuing integration and sustainability | Other                    | Practitioners, organizational leaders, key stakeholders | Organizational and systems support | Other                    |                                                            |
| Action plan | <input type="checkbox"/>        | <input type="checkbox"/>          | <input type="checkbox"/>      | <input type="checkbox"/>                | <input type="checkbox"/> | <input type="checkbox"/>                                | <input type="checkbox"/>           | <input type="checkbox"/> | <div style="border: 1px solid black; height: 20px;"></div> |

|                                                                                   | Phase (select all that apply)   |                                   |                               |                                         |                          | Target Group [select all that apply]                    |                                    |                          | Comment              |
|-----------------------------------------------------------------------------------|---------------------------------|-----------------------------------|-------------------------------|-----------------------------------------|--------------------------|---------------------------------------------------------|------------------------------------|--------------------------|----------------------|
|                                                                                   | Creating awareness and interest | Building knowledge and commitment | Promoting action and adoption | Pursuing integration and sustainability | Other                    | Practitioners, organizational leaders, key stakeholders | Organizational and systems support | Other                    | Enter comments below |
| Actionable and timely data feedback                                               | <input type="checkbox"/>        | <input type="checkbox"/>          | <input type="checkbox"/>      | <input type="checkbox"/>                | <input type="checkbox"/> | <input type="checkbox"/>                                | <input type="checkbox"/>           | <input type="checkbox"/> | <input type="text"/> |
| Announcements and broadcasts                                                      | <input type="checkbox"/>        | <input type="checkbox"/>          | <input type="checkbox"/>      | <input type="checkbox"/>                | <input type="checkbox"/> | <input type="checkbox"/>                                | <input type="checkbox"/>           | <input type="checkbox"/> | <input type="text"/> |
| Annual report                                                                     | <input type="checkbox"/>        | <input type="checkbox"/>          | <input type="checkbox"/>      | <input type="checkbox"/>                | <input type="checkbox"/> | <input type="checkbox"/>                                | <input type="checkbox"/>           | <input type="checkbox"/> | <input type="text"/> |
| Audit and feedback                                                                | <input type="checkbox"/>        | <input type="checkbox"/>          | <input type="checkbox"/>      | <input type="checkbox"/>                | <input type="checkbox"/> | <input type="checkbox"/>                                | <input type="checkbox"/>           | <input type="checkbox"/> | <input type="text"/> |
| Audit key indicators                                                              | <input type="checkbox"/>        | <input type="checkbox"/>          | <input type="checkbox"/>      | <input type="checkbox"/>                | <input type="checkbox"/> | <input type="checkbox"/>                                | <input type="checkbox"/>           | <input type="checkbox"/> | <input type="text"/> |
| Benchmark data                                                                    | <input type="checkbox"/>        | <input type="checkbox"/>          | <input type="checkbox"/>      | <input type="checkbox"/>                | <input type="checkbox"/> | <input type="checkbox"/>                                | <input type="checkbox"/>           | <input type="checkbox"/> | <input type="text"/> |
| Case studies                                                                      | <input type="checkbox"/>        | <input type="checkbox"/>          | <input type="checkbox"/>      | <input type="checkbox"/>                | <input type="checkbox"/> | <input type="checkbox"/>                                | <input type="checkbox"/>           | <input type="checkbox"/> | <input type="text"/> |
| Celebrate local unit progress                                                     | <input type="checkbox"/>        | <input type="checkbox"/>          | <input type="checkbox"/>      | <input type="checkbox"/>                | <input type="checkbox"/> | <input type="checkbox"/>                                | <input type="checkbox"/>           | <input type="checkbox"/> | <input type="text"/> |
|                                                                                   | Creating awareness and interest | Building knowledge and commitment | Promoting action and adoption | Pursuing integration and sustainability | Other                    | Practitioners, organizational leaders, key stakeholders | Organizational and systems support | Other                    | Enter comments below |
| Change agents (e.g., change champion, core group, opinion leader, thought leader) | <input type="checkbox"/>        | <input type="checkbox"/>          | <input type="checkbox"/>      | <input type="checkbox"/>                | <input type="checkbox"/> | <input type="checkbox"/>                                | <input type="checkbox"/>           | <input type="checkbox"/> | <input type="text"/> |
| Checklist                                                                         | <input type="checkbox"/>        | <input type="checkbox"/>          | <input type="checkbox"/>      | <input type="checkbox"/>                | <input type="checkbox"/> | <input type="checkbox"/>                                | <input type="checkbox"/>           | <input type="checkbox"/> | <input type="text"/> |
| Clinician input                                                                   | <input type="checkbox"/>        | <input type="checkbox"/>          | <input type="checkbox"/>      | <input type="checkbox"/>                | <input type="checkbox"/> | <input type="checkbox"/>                                | <input type="checkbox"/>           | <input type="checkbox"/> | <input type="text"/> |
| Competency metric for discontinuing training                                      | <input type="checkbox"/>        | <input type="checkbox"/>          | <input type="checkbox"/>      | <input type="checkbox"/>                | <input type="checkbox"/> | <input type="checkbox"/>                                | <input type="checkbox"/>           | <input type="checkbox"/> | <input type="text"/> |
| Continuing education programs                                                     | <input type="checkbox"/>        | <input type="checkbox"/>          | <input type="checkbox"/>      | <input type="checkbox"/>                | <input type="checkbox"/> | <input type="checkbox"/>                                | <input type="checkbox"/>           | <input type="checkbox"/> | <input type="text"/> |
| Data collection by clinicians                                                     | <input type="checkbox"/>        | <input type="checkbox"/>          | <input type="checkbox"/>      | <input type="checkbox"/>                | <input type="checkbox"/> | <input type="checkbox"/>                                | <input type="checkbox"/>           | <input type="checkbox"/> | <input type="text"/> |
| Demonstrate workflow or decision algorithm                                        | <input type="checkbox"/>        | <input type="checkbox"/>          | <input type="checkbox"/>      | <input type="checkbox"/>                | <input type="checkbox"/> | <input type="checkbox"/>                                | <input type="checkbox"/>           | <input type="checkbox"/> | <input type="text"/> |
| Disseminate credible evidence with clear implications for practice                | <input type="checkbox"/>        | <input type="checkbox"/>          | <input type="checkbox"/>      | <input type="checkbox"/>                | <input type="checkbox"/> | <input type="checkbox"/>                                | <input type="checkbox"/>           | <input type="checkbox"/> | <input type="text"/> |
| Distribute key evidence                                                           | <input type="checkbox"/>        | <input type="checkbox"/>          | <input type="checkbox"/>      | <input type="checkbox"/>                | <input type="checkbox"/> | <input type="checkbox"/>                                | <input type="checkbox"/>           | <input type="checkbox"/> | <input type="text"/> |
|                                                                                   | Creating awareness and interest | Building knowledge and commitment | Promoting action and adoption | Pursuing integration and sustainability | Other                    | Practitioners, organizational leaders, key stakeholders | Organizational and systems support | Other                    | Enter comments below |
| Documentation                                                                     | <input type="checkbox"/>        | <input type="checkbox"/>          | <input type="checkbox"/>      | <input type="checkbox"/>                | <input type="checkbox"/> | <input type="checkbox"/>                                | <input type="checkbox"/>           | <input type="checkbox"/> | <input type="text"/> |
| Education (e.g., live, virtual, or computer-based)                                | <input type="checkbox"/>        | <input type="checkbox"/>          | <input type="checkbox"/>      | <input type="checkbox"/>                | <input type="checkbox"/> | <input type="checkbox"/>                                | <input type="checkbox"/>           | <input type="checkbox"/> | <input type="text"/> |
| Educational outreach/academic detailing                                           | <input type="checkbox"/>        | <input type="checkbox"/>          | <input type="checkbox"/>      | <input type="checkbox"/>                | <input type="checkbox"/> | <input type="checkbox"/>                                | <input type="checkbox"/>           | <input type="checkbox"/> | <input type="text"/> |
| Elevator speech                                                                   | <input type="checkbox"/>        | <input type="checkbox"/>          | <input type="checkbox"/>      | <input type="checkbox"/>                | <input type="checkbox"/> | <input type="checkbox"/>                                | <input type="checkbox"/>           | <input type="checkbox"/> | <input type="text"/> |
| Financial incentives                                                              | <input type="checkbox"/>        | <input type="checkbox"/>          | <input type="checkbox"/>      | <input type="checkbox"/>                | <input type="checkbox"/> | <input type="checkbox"/>                                | <input type="checkbox"/>           | <input type="checkbox"/> | <input type="text"/> |
| Focus groups for planning change                                                  | <input type="checkbox"/>        | <input type="checkbox"/>          | <input type="checkbox"/>      | <input type="checkbox"/>                | <input type="checkbox"/> | <input type="checkbox"/>                                | <input type="checkbox"/>           | <input type="checkbox"/> | <input type="text"/> |
| Gap assessment/gap analysis                                                       | <input type="checkbox"/>        | <input type="checkbox"/>          | <input type="checkbox"/>      | <input type="checkbox"/>                | <input type="checkbox"/> | <input type="checkbox"/>                                | <input type="checkbox"/>           | <input type="checkbox"/> | <input type="text"/> |
| Give evaluation results to colleagues                                             | <input type="checkbox"/>        | <input type="checkbox"/>          | <input type="checkbox"/>      | <input type="checkbox"/>                | <input type="checkbox"/> | <input type="checkbox"/>                                | <input type="checkbox"/>           | <input type="checkbox"/> | <input type="text"/> |
| Highlight advantages or anticipated impact                                        | <input type="checkbox"/>        | <input type="checkbox"/>          | <input type="checkbox"/>      | <input type="checkbox"/>                | <input type="checkbox"/> | <input type="checkbox"/>                                | <input type="checkbox"/>           | <input type="checkbox"/> | <input type="text"/> |
|                                                                                   | Creating awareness and interest | Building knowledge and commitment | Promoting action and adoption | Pursuing integration and sustainability | Other                    | Practitioners, organizational leaders, key stakeholders | Organizational and systems support | Other                    | Enter comments below |
| Highlight compatibility                                                           | <input type="checkbox"/>        | <input type="checkbox"/>          | <input type="checkbox"/>      | <input type="checkbox"/>                | <input type="checkbox"/> | <input type="checkbox"/>                                | <input type="checkbox"/>           | <input type="checkbox"/> | <input type="text"/> |
| Incentives                                                                        | <input type="checkbox"/>        | <input type="checkbox"/>          | <input type="checkbox"/>      | <input type="checkbox"/>                | <input type="checkbox"/> | <input type="checkbox"/>                                | <input type="checkbox"/>           | <input type="checkbox"/> | <input type="text"/> |
| Individual performance evaluation                                                 | <input type="checkbox"/>        | <input type="checkbox"/>          | <input type="checkbox"/>      | <input type="checkbox"/>                | <input type="checkbox"/> | <input type="checkbox"/>                                | <input type="checkbox"/>           | <input type="checkbox"/> | <input type="text"/> |
| Individualize data feedback                                                       | <input type="checkbox"/>        | <input type="checkbox"/>          | <input type="checkbox"/>      | <input type="checkbox"/>                | <input type="checkbox"/> | <input type="checkbox"/>                                | <input type="checkbox"/>           | <input type="checkbox"/> | <input type="text"/> |

|                                                                                                                     | Phase (select all that apply)   |                                   |                               |                                         |                          | Target Group [select all that apply]                    |                                    |                          | Comment              |
|---------------------------------------------------------------------------------------------------------------------|---------------------------------|-----------------------------------|-------------------------------|-----------------------------------------|--------------------------|---------------------------------------------------------|------------------------------------|--------------------------|----------------------|
|                                                                                                                     | Creating awareness and interest | Building knowledge and commitment | Promoting action and adoption | Pursuing integration and sustainability | Other                    | Practitioners, organizational leaders, key stakeholders | Organizational and systems support | Other                    | Enter comments below |
| Inform organizational leaders                                                                                       | <input type="checkbox"/>        | <input type="checkbox"/>          | <input type="checkbox"/>      | <input type="checkbox"/>                | <input type="checkbox"/> | <input type="checkbox"/>                                | <input type="checkbox"/>           | <input type="checkbox"/> | <input type="text"/> |
| Integrate practice change with other EBP protocols                                                                  | <input type="checkbox"/>        | <input type="checkbox"/>          | <input type="checkbox"/>      | <input type="checkbox"/>                | <input type="checkbox"/> | <input type="checkbox"/>                                | <input type="checkbox"/>           | <input type="checkbox"/> | <input type="text"/> |
| Journal club                                                                                                        | <input type="checkbox"/>        | <input type="checkbox"/>          | <input type="checkbox"/>      | <input type="checkbox"/>                | <input type="checkbox"/> | <input type="checkbox"/>                                | <input type="checkbox"/>           | <input type="checkbox"/> | <input type="text"/> |
| Knowledge broker                                                                                                    | <input type="checkbox"/>        | <input type="checkbox"/>          | <input type="checkbox"/>      | <input type="checkbox"/>                | <input type="checkbox"/> | <input type="checkbox"/>                                | <input type="checkbox"/>           | <input type="checkbox"/> | <input type="text"/> |
| Link practice change and power holder/stakeholder priorities                                                        | <input type="checkbox"/>        | <input type="checkbox"/>          | <input type="checkbox"/>      | <input type="checkbox"/>                | <input type="checkbox"/> | <input type="checkbox"/>                                | <input type="checkbox"/>           | <input type="checkbox"/> | <input type="text"/> |
|                                                                                                                     | Creating awareness and interest | Building knowledge and commitment | Promoting action and adoption | Pursuing integration and sustainability | Other                    | Practitioners, organizational leaders, key stakeholders | Organizational and systems support | Other                    | Enter comments below |
| Link to patient/family needs and organizational priorities                                                          | <input type="checkbox"/>        | <input type="checkbox"/>          | <input type="checkbox"/>      | <input type="checkbox"/>                | <input type="checkbox"/> | <input type="checkbox"/>                                | <input type="checkbox"/>           | <input type="checkbox"/> | <input type="text"/> |
| Local adaptation and simplify                                                                                       | <input type="checkbox"/>        | <input type="checkbox"/>          | <input type="checkbox"/>      | <input type="checkbox"/>                | <input type="checkbox"/> | <input type="checkbox"/>                                | <input type="checkbox"/>           | <input type="checkbox"/> | <input type="text"/> |
| Make impact observable                                                                                              | <input type="checkbox"/>        | <input type="checkbox"/>          | <input type="checkbox"/>      | <input type="checkbox"/>                | <input type="checkbox"/> | <input type="checkbox"/>                                | <input type="checkbox"/>           | <input type="checkbox"/> | <input type="text"/> |
| Match practice change with resources and equipment                                                                  | <input type="checkbox"/>        | <input type="checkbox"/>          | <input type="checkbox"/>      | <input type="checkbox"/>                | <input type="checkbox"/> | <input type="checkbox"/>                                | <input type="checkbox"/>           | <input type="checkbox"/> | <input type="text"/> |
| Mobile "show on the road"                                                                                           | <input type="checkbox"/>        | <input type="checkbox"/>          | <input type="checkbox"/>      | <input type="checkbox"/>                | <input type="checkbox"/> | <input type="checkbox"/>                                | <input type="checkbox"/>           | <input type="checkbox"/> | <input type="text"/> |
| Multidisciplinary discussion and troubleshooting                                                                    | <input type="checkbox"/>        | <input type="checkbox"/>          | <input type="checkbox"/>      | <input type="checkbox"/>                | <input type="checkbox"/> | <input type="checkbox"/>                                | <input type="checkbox"/>           | <input type="checkbox"/> | <input type="text"/> |
| Non-punitive discussion of results                                                                                  | <input type="checkbox"/>        | <input type="checkbox"/>          | <input type="checkbox"/>      | <input type="checkbox"/>                | <input type="checkbox"/> | <input type="checkbox"/>                                | <input type="checkbox"/>           | <input type="checkbox"/> | <input type="text"/> |
| Patient decision aids                                                                                               | <input type="checkbox"/>        | <input type="checkbox"/>          | <input type="checkbox"/>      | <input type="checkbox"/>                | <input type="checkbox"/> | <input type="checkbox"/>                                | <input type="checkbox"/>           | <input type="checkbox"/> | <input type="text"/> |
| Patient reminders                                                                                                   | <input type="checkbox"/>        | <input type="checkbox"/>          | <input type="checkbox"/>      | <input type="checkbox"/>                | <input type="checkbox"/> | <input type="checkbox"/>                                | <input type="checkbox"/>           | <input type="checkbox"/> | <input type="text"/> |
|                                                                                                                     | Creating awareness and interest | Building knowledge and commitment | Promoting action and adoption | Pursuing integration and sustainability | Other                    | Practitioners, organizational leaders, key stakeholders | Organizational and systems support | Other                    | Enter comments below |
| Peer influence                                                                                                      | <input type="checkbox"/>        | <input type="checkbox"/>          | <input type="checkbox"/>      | <input type="checkbox"/>                | <input type="checkbox"/> | <input type="checkbox"/>                                | <input type="checkbox"/>           | <input type="checkbox"/> | <input type="text"/> |
| Personalize the messages to staff (e.g., reduces work, reduces infection exposure) based on actual improvement data | <input type="checkbox"/>        | <input type="checkbox"/>          | <input type="checkbox"/>      | <input type="checkbox"/>                | <input type="checkbox"/> | <input type="checkbox"/>                                | <input type="checkbox"/>           | <input type="checkbox"/> | <input type="text"/> |
| Pocket guides                                                                                                       | <input type="checkbox"/>        | <input type="checkbox"/>          | <input type="checkbox"/>      | <input type="checkbox"/>                | <input type="checkbox"/> | <input type="checkbox"/>                                | <input type="checkbox"/>           | <input type="checkbox"/> | <input type="text"/> |
| Posters and postings/fliers                                                                                         | <input type="checkbox"/>        | <input type="checkbox"/>          | <input type="checkbox"/>      | <input type="checkbox"/>                | <input type="checkbox"/> | <input type="checkbox"/>                                | <input type="checkbox"/>           | <input type="checkbox"/> | <input type="text"/> |
| Present in educational programs                                                                                     | <input type="checkbox"/>        | <input type="checkbox"/>          | <input type="checkbox"/>      | <input type="checkbox"/>                | <input type="checkbox"/> | <input type="checkbox"/>                                | <input type="checkbox"/>           | <input type="checkbox"/> | <input type="text"/> |
| Project responsibility in unit or organizational committee                                                          | <input type="checkbox"/>        | <input type="checkbox"/>          | <input type="checkbox"/>      | <input type="checkbox"/>                | <input type="checkbox"/> | <input type="checkbox"/>                                | <input type="checkbox"/>           | <input type="checkbox"/> | <input type="text"/> |
| Provide recognition at the point of care                                                                            | <input type="checkbox"/>        | <input type="checkbox"/>          | <input type="checkbox"/>      | <input type="checkbox"/>                | <input type="checkbox"/> | <input type="checkbox"/>                                | <input type="checkbox"/>           | <input type="checkbox"/> | <input type="text"/> |
| Public recognition                                                                                                  | <input type="checkbox"/>        | <input type="checkbox"/>          | <input type="checkbox"/>      | <input type="checkbox"/>                | <input type="checkbox"/> | <input type="checkbox"/>                                | <input type="checkbox"/>           | <input type="checkbox"/> | <input type="text"/> |
| Publicize new equipment                                                                                             | <input type="checkbox"/>        | <input type="checkbox"/>          | <input type="checkbox"/>      | <input type="checkbox"/>                | <input type="checkbox"/> | <input type="checkbox"/>                                | <input type="checkbox"/>           | <input type="checkbox"/> | <input type="text"/> |
|                                                                                                                     | Creating awareness and interest | Building knowledge and commitment | Promoting action and adoption | Pursuing integration and sustainability | Other                    | Practitioners, organizational leaders, key stakeholders | Organizational and systems support | Other                    | Enter comments below |
| Reminders or practice prompts                                                                                       | <input type="checkbox"/>        | <input type="checkbox"/>          | <input type="checkbox"/>      | <input type="checkbox"/>                | <input type="checkbox"/> | <input type="checkbox"/>                                | <input type="checkbox"/>           | <input type="checkbox"/> | <input type="text"/> |
| Report into quality improvement program                                                                             | <input type="checkbox"/>        | <input type="checkbox"/>          | <input type="checkbox"/>      | <input type="checkbox"/>                | <input type="checkbox"/> | <input type="checkbox"/>                                | <input type="checkbox"/>           | <input type="checkbox"/> | <input type="text"/> |
| Report progress and updates                                                                                         | <input type="checkbox"/>        | <input type="checkbox"/>          | <input type="checkbox"/>      | <input type="checkbox"/>                | <input type="checkbox"/> | <input type="checkbox"/>                                | <input type="checkbox"/>           | <input type="checkbox"/> | <input type="text"/> |
| Report to senior leaders                                                                                            | <input type="checkbox"/>        | <input type="checkbox"/>          | <input type="checkbox"/>      | <input type="checkbox"/>                | <input type="checkbox"/> | <input type="checkbox"/>                                | <input type="checkbox"/>           | <input type="checkbox"/> | <input type="text"/> |

|                                                                                                          | Phase (select all that apply)   |                                   |                               |                                         |                          | Target Group [select all that apply]                    |                                    |                          | Comment<br>Enter comments below |
|----------------------------------------------------------------------------------------------------------|---------------------------------|-----------------------------------|-------------------------------|-----------------------------------------|--------------------------|---------------------------------------------------------|------------------------------------|--------------------------|---------------------------------|
|                                                                                                          | Creating awareness and interest | Building knowledge and commitment | Promoting action and adoption | Pursuing integration and sustainability | Other                    | Practitioners, organizational leaders, key stakeholders | Organizational and systems support | Other                    |                                 |
| Report within organizational infrastructure                                                              | <input type="checkbox"/>        | <input type="checkbox"/>          | <input type="checkbox"/>      | <input type="checkbox"/>                | <input type="checkbox"/> | <input type="checkbox"/>                                | <input type="checkbox"/>           | <input type="checkbox"/> | <input type="text"/>            |
| Resource manual or materials                                                                             | <input type="checkbox"/>        | <input type="checkbox"/>          | <input type="checkbox"/>      | <input type="checkbox"/>                | <input type="checkbox"/> | <input type="checkbox"/>                                | <input type="checkbox"/>           | <input type="checkbox"/> | <input type="text"/>            |
| Resource materials and quick reference guides                                                            | <input type="checkbox"/>        | <input type="checkbox"/>          | <input type="checkbox"/>      | <input type="checkbox"/>                | <input type="checkbox"/> | <input type="checkbox"/>                                | <input type="checkbox"/>           | <input type="checkbox"/> | <input type="text"/>            |
| Revise policy, procedure, or protocol                                                                    | <input type="checkbox"/>        | <input type="checkbox"/>          | <input type="checkbox"/>      | <input type="checkbox"/>                | <input type="checkbox"/> | <input type="checkbox"/>                                | <input type="checkbox"/>           | <input type="checkbox"/> | <input type="text"/>            |
| Role model                                                                                               | <input type="checkbox"/>        | <input type="checkbox"/>          | <input type="checkbox"/>      | <input type="checkbox"/>                | <input type="checkbox"/> | <input type="checkbox"/>                                | <input type="checkbox"/>           | <input type="checkbox"/> | <input type="text"/>            |
|                                                                                                          | Creating awareness and interest | Building knowledge and commitment | Promoting action and adoption | Pursuing integration and sustainability | Other                    | Practitioners, organizational leaders, key stakeholders | Organizational and systems support | Other                    | Enter comments below            |
| Rounding by unit and organizational leadership                                                           | <input type="checkbox"/>        | <input type="checkbox"/>          | <input type="checkbox"/>      | <input type="checkbox"/>                | <input type="checkbox"/> | <input type="checkbox"/>                                | <input type="checkbox"/>           | <input type="checkbox"/> | <input type="text"/>            |
| Senior executive announcements                                                                           | <input type="checkbox"/>        | <input type="checkbox"/>          | <input type="checkbox"/>      | <input type="checkbox"/>                | <input type="checkbox"/> | <input type="checkbox"/>                                | <input type="checkbox"/>           | <input type="checkbox"/> | <input type="text"/>            |
| Share protocol revisions with clinicians that are based on feedback from clinicians, patients, or family | <input type="checkbox"/>        | <input type="checkbox"/>          | <input type="checkbox"/>      | <input type="checkbox"/>                | <input type="checkbox"/> | <input type="checkbox"/>                                | <input type="checkbox"/>           | <input type="checkbox"/> | <input type="text"/>            |
| Skill competence                                                                                         | <input type="checkbox"/>        | <input type="checkbox"/>          | <input type="checkbox"/>      | <input type="checkbox"/>                | <input type="checkbox"/> | <input type="checkbox"/>                                | <input type="checkbox"/>           | <input type="checkbox"/> | <input type="text"/>            |
| Slogans and logos                                                                                        | <input type="checkbox"/>        | <input type="checkbox"/>          | <input type="checkbox"/>      | <input type="checkbox"/>                | <input type="checkbox"/> | <input type="checkbox"/>                                | <input type="checkbox"/>           | <input type="checkbox"/> | <input type="text"/>            |
| Sound bites                                                                                              | <input type="checkbox"/>        | <input type="checkbox"/>          | <input type="checkbox"/>      | <input type="checkbox"/>                | <input type="checkbox"/> | <input type="checkbox"/>                                | <input type="checkbox"/>           | <input type="checkbox"/> | <input type="text"/>            |
| Staff meetings                                                                                           | <input type="checkbox"/>        | <input type="checkbox"/>          | <input type="checkbox"/>      | <input type="checkbox"/>                | <input type="checkbox"/> | <input type="checkbox"/>                                | <input type="checkbox"/>           | <input type="checkbox"/> | <input type="text"/>            |
| Standing orders                                                                                          | <input type="checkbox"/>        | <input type="checkbox"/>          | <input type="checkbox"/>      | <input type="checkbox"/>                | <input type="checkbox"/> | <input type="checkbox"/>                                | <input type="checkbox"/>           | <input type="checkbox"/> | <input type="text"/>            |
| Strategic plan                                                                                           | <input type="checkbox"/>        | <input type="checkbox"/>          | <input type="checkbox"/>      | <input type="checkbox"/>                | <input type="checkbox"/> | <input type="checkbox"/>                                | <input type="checkbox"/>           | <input type="checkbox"/> | <input type="text"/>            |
|                                                                                                          | Creating awareness and interest | Building knowledge and commitment | Promoting action and adoption | Pursuing integration and sustainability | Other                    | Practitioners, organizational leaders, key stakeholders | Organizational and systems support | Other                    | Enter comments below            |
| Teamwork                                                                                                 | <input type="checkbox"/>        | <input type="checkbox"/>          | <input type="checkbox"/>      | <input type="checkbox"/>                | <input type="checkbox"/> | <input type="checkbox"/>                                | <input type="checkbox"/>           | <input type="checkbox"/> | <input type="text"/>            |
| Trend results                                                                                            | <input type="checkbox"/>        | <input type="checkbox"/>          | <input type="checkbox"/>      | <input type="checkbox"/>                | <input type="checkbox"/> | <input type="checkbox"/>                                | <input type="checkbox"/>           | <input type="checkbox"/> | <input type="text"/>            |
| Troubleshoot use/application                                                                             | <input type="checkbox"/>        | <input type="checkbox"/>          | <input type="checkbox"/>      | <input type="checkbox"/>                | <input type="checkbox"/> | <input type="checkbox"/>                                | <input type="checkbox"/>           | <input type="checkbox"/> | <input type="text"/>            |
| Troubleshooting at the point of care/bedside                                                             | <input type="checkbox"/>        | <input type="checkbox"/>          | <input type="checkbox"/>      | <input type="checkbox"/>                | <input type="checkbox"/> | <input type="checkbox"/>                                | <input type="checkbox"/>           | <input type="checkbox"/> | <input type="text"/>            |
| Trying the practice change                                                                               | <input type="checkbox"/>        | <input type="checkbox"/>          | <input type="checkbox"/>      | <input type="checkbox"/>                | <input type="checkbox"/> | <input type="checkbox"/>                                | <input type="checkbox"/>           | <input type="checkbox"/> | <input type="text"/>            |
| Unit in-services                                                                                         | <input type="checkbox"/>        | <input type="checkbox"/>          | <input type="checkbox"/>      | <input type="checkbox"/>                | <input type="checkbox"/> | <input type="checkbox"/>                                | <input type="checkbox"/>           | <input type="checkbox"/> | <input type="text"/>            |
| Unit newsletter                                                                                          | <input type="checkbox"/>        | <input type="checkbox"/>          | <input type="checkbox"/>      | <input type="checkbox"/>                | <input type="checkbox"/> | <input type="checkbox"/>                                | <input type="checkbox"/>           | <input type="checkbox"/> | <input type="text"/>            |
| Unit orientation                                                                                         | <input type="checkbox"/>        | <input type="checkbox"/>          | <input type="checkbox"/>      | <input type="checkbox"/>                | <input type="checkbox"/> | <input type="checkbox"/>                                | <input type="checkbox"/>           | <input type="checkbox"/> | <input type="text"/>            |
| Update practice reminders                                                                                | <input type="checkbox"/>        | <input type="checkbox"/>          | <input type="checkbox"/>      | <input type="checkbox"/>                | <input type="checkbox"/> | <input type="checkbox"/>                                | <input type="checkbox"/>           | <input type="checkbox"/> | <input type="text"/>            |

Should the strategies listed below be added to the model?

|                           | Yes                      | No                       |
|---------------------------|--------------------------|--------------------------|
| Advisory boards           | <input type="checkbox"/> | <input type="checkbox"/> |
| Cultural broker           | <input type="checkbox"/> | <input type="checkbox"/> |
| Disincentives             | <input type="checkbox"/> | <input type="checkbox"/> |
| Learning collaborative    | <input type="checkbox"/> | <input type="checkbox"/> |
| Revise professional roles | <input type="checkbox"/> | <input type="checkbox"/> |
| Social media influencer   | <input type="checkbox"/> | <input type="checkbox"/> |
| Visit other sites         | <input type="checkbox"/> | <input type="checkbox"/> |



For each new implementation strategy you chose, please select all of the phase(s) and target group(s) that you believe the strategy can be applied to.

|                             | Phase [select all that apply]   |                                   |                               |                                         |                          | Target Group [select all that apply]                    |                                    |                          | Click to write Column 3 |
|-----------------------------|---------------------------------|-----------------------------------|-------------------------------|-----------------------------------------|--------------------------|---------------------------------------------------------|------------------------------------|--------------------------|-------------------------|
|                             | Creating awareness and interest | Building knowledge and commitment | Promoting action and adoption | Pursuing integration and sustainability | Other                    | Practitioners, organizational leaders, key stakeholders | Organizational and systems support | Other                    | Enter comments below    |
| » Advisory boards           | <input type="checkbox"/>        | <input type="checkbox"/>          | <input type="checkbox"/>      | <input type="checkbox"/>                | <input type="checkbox"/> | <input type="checkbox"/>                                | <input type="checkbox"/>           | <input type="checkbox"/> | <input type="text"/>    |
| » Cultural broker           | <input type="checkbox"/>        | <input type="checkbox"/>          | <input type="checkbox"/>      | <input type="checkbox"/>                | <input type="checkbox"/> | <input type="checkbox"/>                                | <input type="checkbox"/>           | <input type="checkbox"/> | <input type="text"/>    |
| » Disincentives             | <input type="checkbox"/>        | <input type="checkbox"/>          | <input type="checkbox"/>      | <input type="checkbox"/>                | <input type="checkbox"/> | <input type="checkbox"/>                                | <input type="checkbox"/>           | <input type="checkbox"/> | <input type="text"/>    |
| » Learning collaborative    | <input type="checkbox"/>        | <input type="checkbox"/>          | <input type="checkbox"/>      | <input type="checkbox"/>                | <input type="checkbox"/> | <input type="checkbox"/>                                | <input type="checkbox"/>           | <input type="checkbox"/> | <input type="text"/>    |
| » Revise professional roles | <input type="checkbox"/>        | <input type="checkbox"/>          | <input type="checkbox"/>      | <input type="checkbox"/>                | <input type="checkbox"/> | <input type="checkbox"/>                                | <input type="checkbox"/>           | <input type="checkbox"/> | <input type="text"/>    |
| » Social media influencer   | <input type="checkbox"/>        | <input type="checkbox"/>          | <input type="checkbox"/>      | <input type="checkbox"/>                | <input type="checkbox"/> | <input type="checkbox"/>                                | <input type="checkbox"/>           | <input type="checkbox"/> | <input type="text"/>    |
| » Visit other sites         | <input type="checkbox"/>        | <input type="checkbox"/>          | <input type="checkbox"/>      | <input type="checkbox"/>                | <input type="checkbox"/> | <input type="checkbox"/>                                | <input type="checkbox"/>           | <input type="checkbox"/> | <input type="text"/>    |

Please list any additional implementation strategies you recommend and select all of the phase(s) and target group(s) that you believe the strategy can be applied to.

|                                                               | Phase [select all that apply]   |                                   |                               |                                         |                          | Target Group [select all that apply]                    |                                    |                          | Comment              |
|---------------------------------------------------------------|---------------------------------|-----------------------------------|-------------------------------|-----------------------------------------|--------------------------|---------------------------------------------------------|------------------------------------|--------------------------|----------------------|
|                                                               | Creating awareness and interest | Building knowledge and commitment | Promoting action and adoption | Pursuing integration and sustainability | Other                    | Practitioners, organizational leaders, key stakeholders | Organizational and systems support | Other                    | Enter comments below |
| Additional implementation strategies:<br><input type="text"/> | <input type="checkbox"/>        | <input type="checkbox"/>          | <input type="checkbox"/>      | <input type="checkbox"/>                | <input type="checkbox"/> | <input type="checkbox"/>                                | <input type="checkbox"/>           | <input type="checkbox"/> | <input type="text"/> |
| Click to write Statement 2<br><input type="text"/>            | <input type="checkbox"/>        | <input type="checkbox"/>          | <input type="checkbox"/>      | <input type="checkbox"/>                | <input type="checkbox"/> | <input type="checkbox"/>                                | <input type="checkbox"/>           | <input type="checkbox"/> | <input type="text"/> |
| Click to write Statement 3<br><input type="text"/>            | <input type="checkbox"/>        | <input type="checkbox"/>          | <input type="checkbox"/>      | <input type="checkbox"/>                | <input type="checkbox"/> | <input type="checkbox"/>                                | <input type="checkbox"/>           | <input type="checkbox"/> | <input type="text"/> |
| Click to write Statement 4<br><input type="text"/>            | <input type="checkbox"/>        | <input type="checkbox"/>          | <input type="checkbox"/>      | <input type="checkbox"/>                | <input type="checkbox"/> | <input type="checkbox"/>                                | <input type="checkbox"/>           | <input type="checkbox"/> | <input type="text"/> |
| Click to write Statement 5<br><input type="text"/>            | <input type="checkbox"/>        | <input type="checkbox"/>          | <input type="checkbox"/>      | <input type="checkbox"/>                | <input type="checkbox"/> | <input type="checkbox"/>                                | <input type="checkbox"/>           | <input type="checkbox"/> | <input type="text"/> |
| Click to write Statement 6<br><input type="text"/>            | <input type="checkbox"/>        | <input type="checkbox"/>          | <input type="checkbox"/>      | <input type="checkbox"/>                | <input type="checkbox"/> | <input type="checkbox"/>                                | <input type="checkbox"/>           | <input type="checkbox"/> | <input type="text"/> |

**Block 2**

Thank you for participating in this survey. If you would like to leave any additional comments, please do so below.
